# Supplementary material for: Isthmin-1 attenuates allergic Asthma by stimulating adiponectin expression and alveolar macrophage efferocytosis in mice
Source: Springer Nature journal article supplement (doi:10.1186/s12931-023-02569-1), 2023-11-06
Supplement: MOESM10 [file 26270538]

# **Isthmin-1 attenuates allergic asthma by stimulating adiponectin expression and alveolar macrophage efferocytosis in mice**

Jong Huat Tee<sup>1</sup>, Udhaya Vijayakumar<sup>1</sup>, Mahalakshmi Shanmugasundaram<sup>1</sup>, Terence Y.

W. Lam<sup>1</sup>, Wupeng Liao<sup>2</sup>, Yuansheng Yang<sup>3</sup>, W. S. Fred Wong<sup>2,4,5\*</sup>, Ruowen Ge<sup>1\*</sup>

Uncropped blots

# Full unedited blot in Figure 2I

Antibodies: Cleaved-TGF $\beta_1$  (13kDa) and  $\beta$ -actin (42kDa)

TGF $\beta_1$

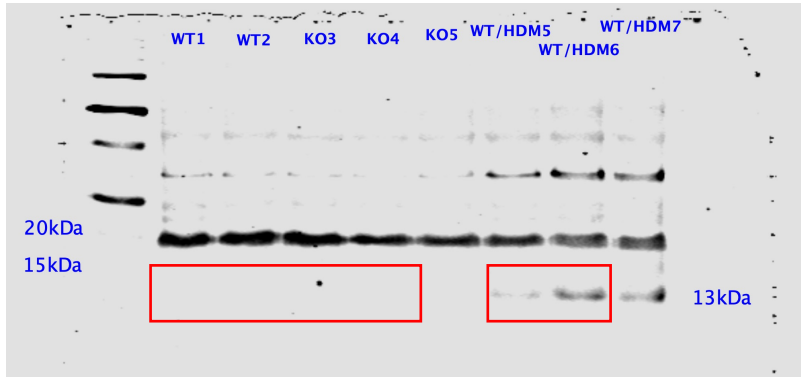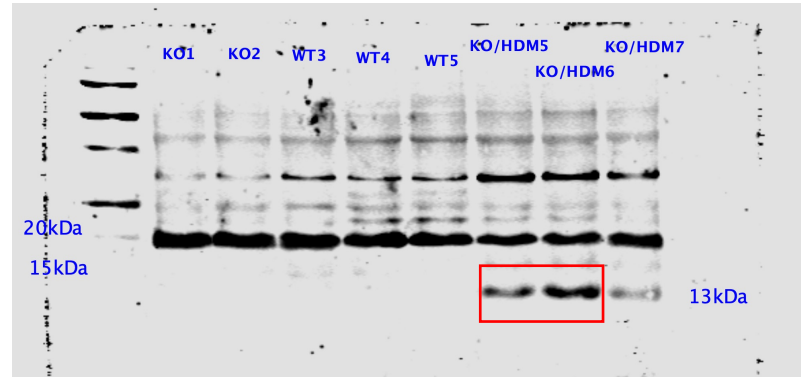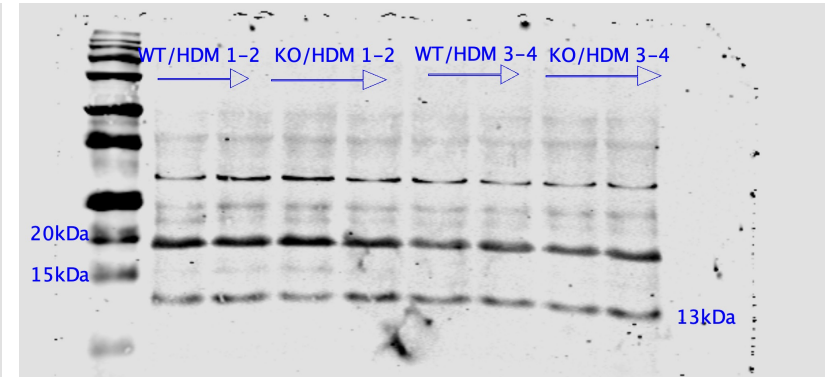

$\beta$ -actin

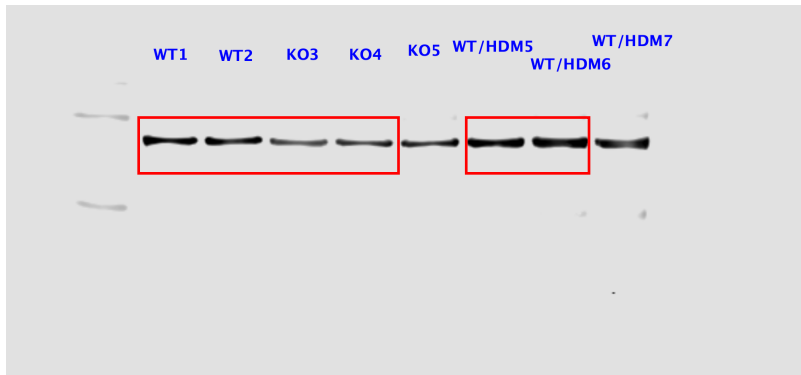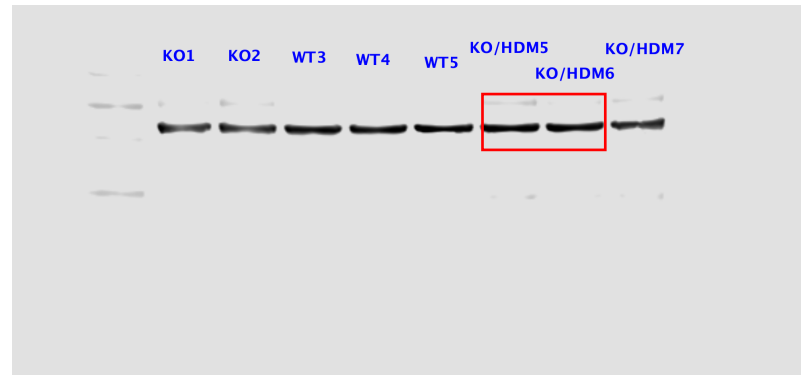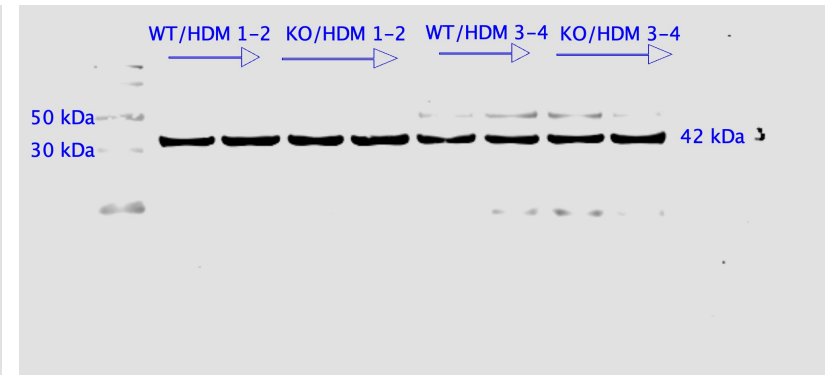

Mb1

Mb2

Mb3

Representative bands

# Full unedited blot in Figure 4A

Antibodies: pMLKL (54kDa) and  $\beta$ -actin (42kDa)

Upper band: pMLKL; lower band:  $\beta$ -actin

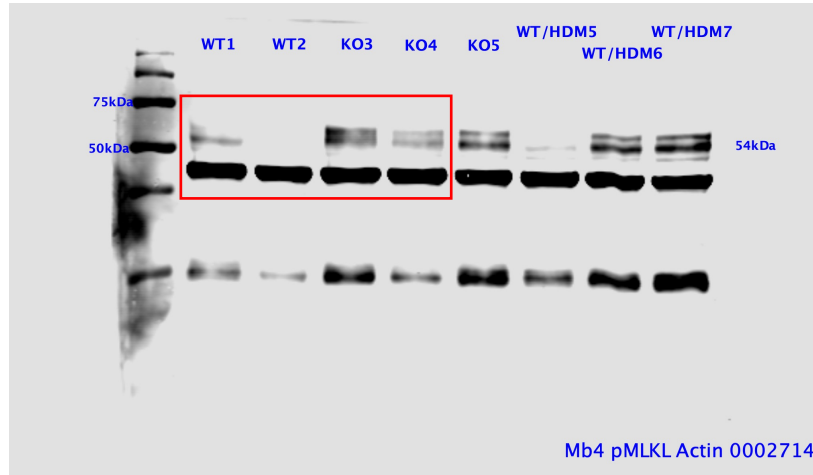

Mb1

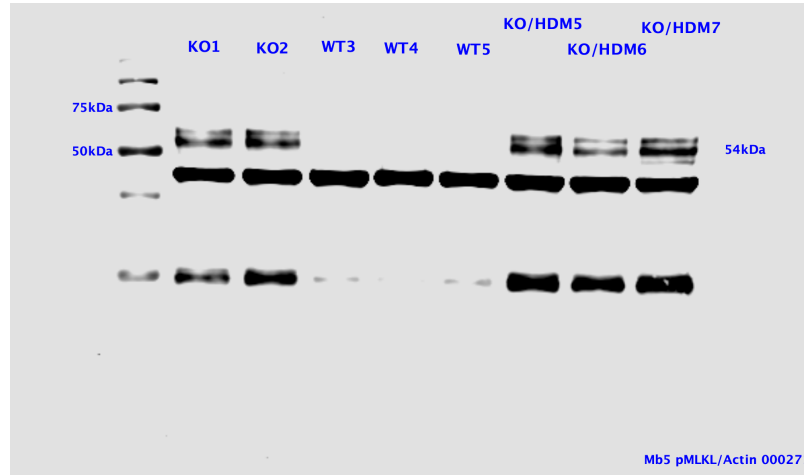

Mb2

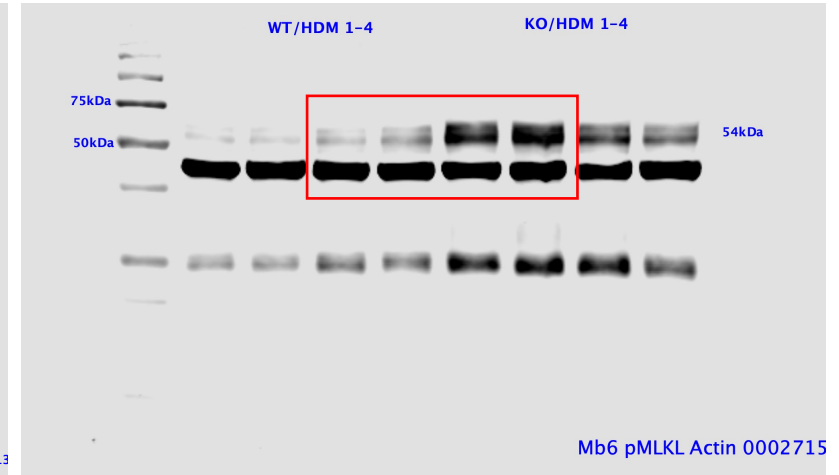

Mb3

Representative bands

# Full unedited blot in Figure 4B

Antibodies: RIP3 (57kDa) and  $\beta$ -actin (42kDa)

RIP3

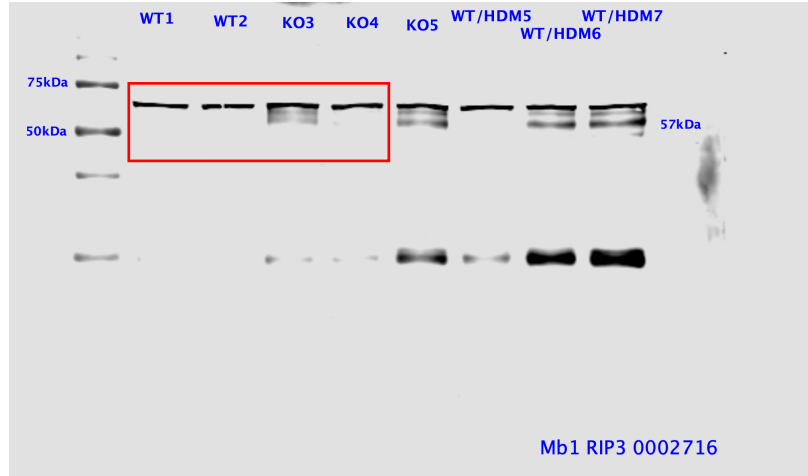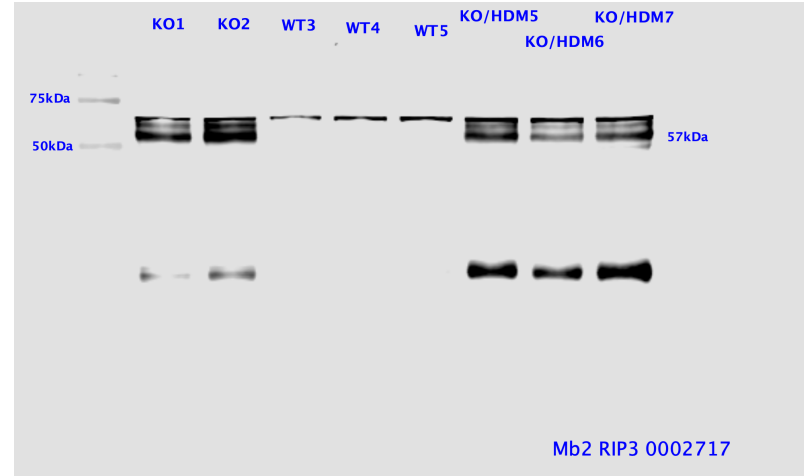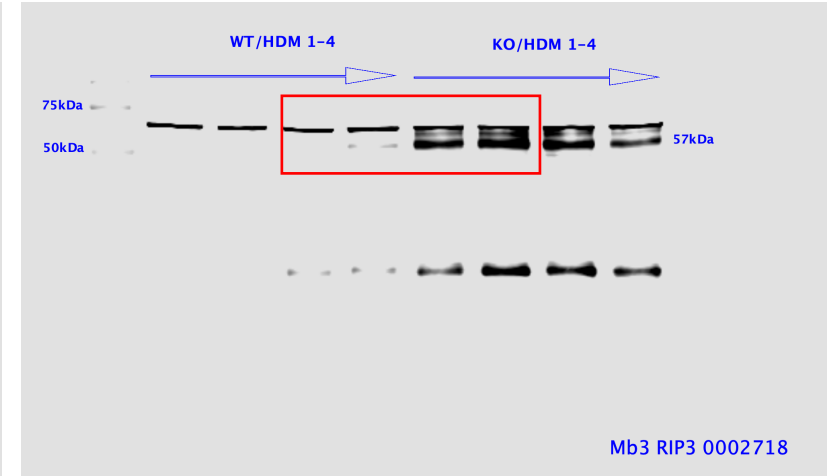

$\beta$ -actin

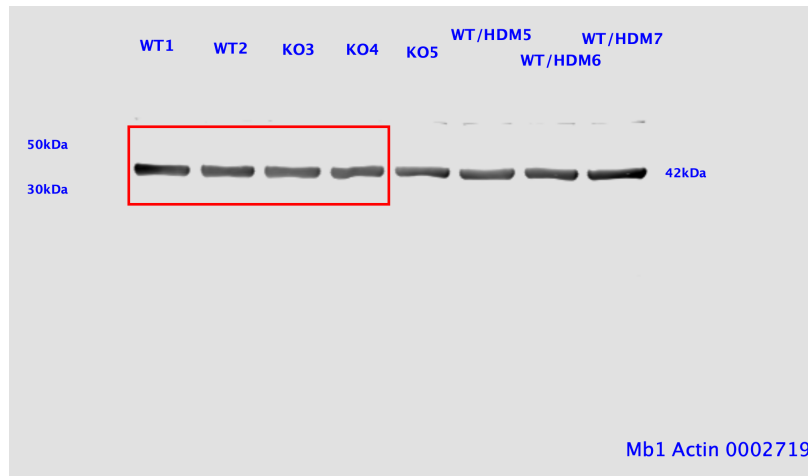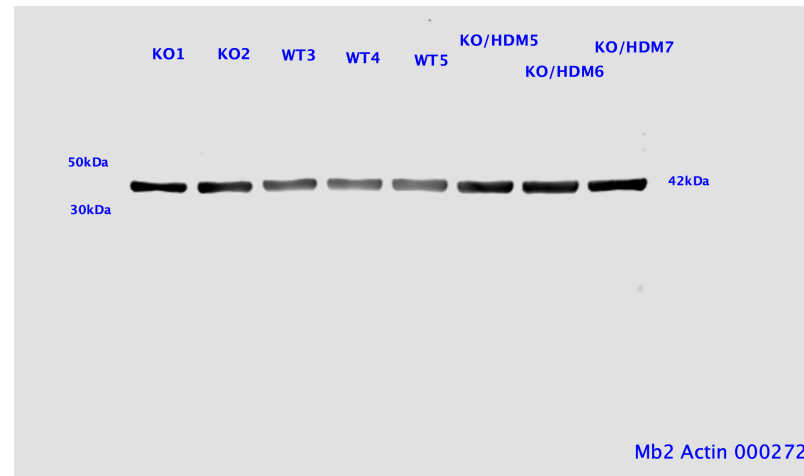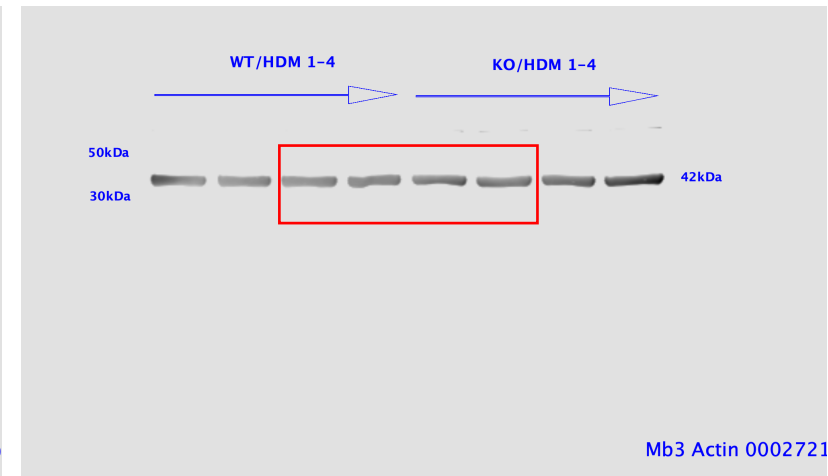

Mb1

Mb2

Mb3

Representative bands

# Full unedited blot in Figure 4C

Antibodies: Caspase 8 (57kDa), cleaved Caspase 8 (43kDa) and  $\beta$ -actin (42kDa)

## Caspase 8

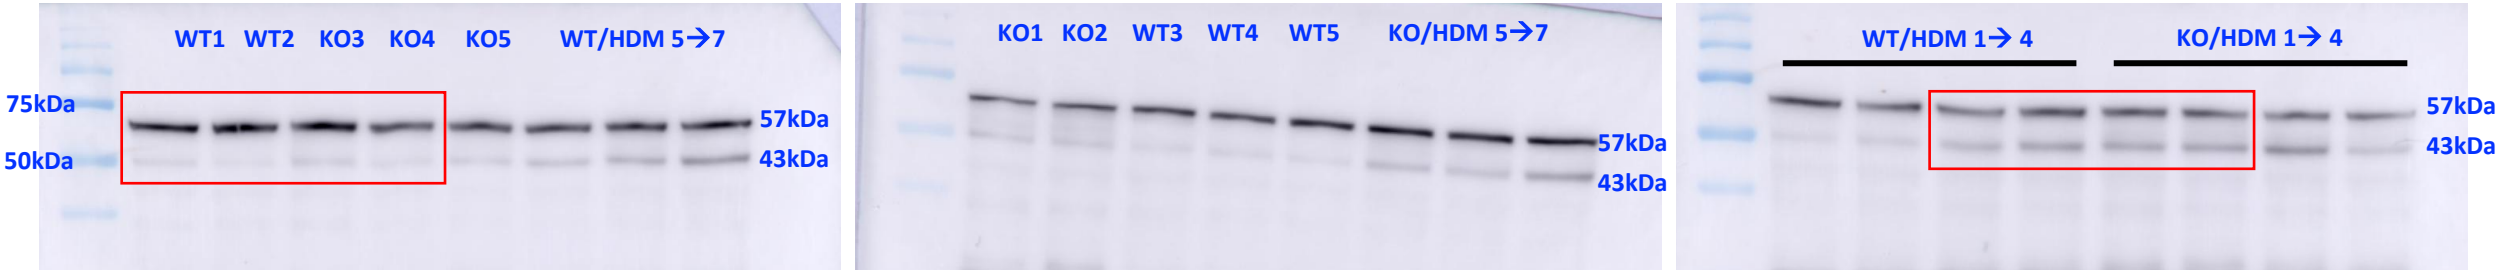

## $\beta$ -actin

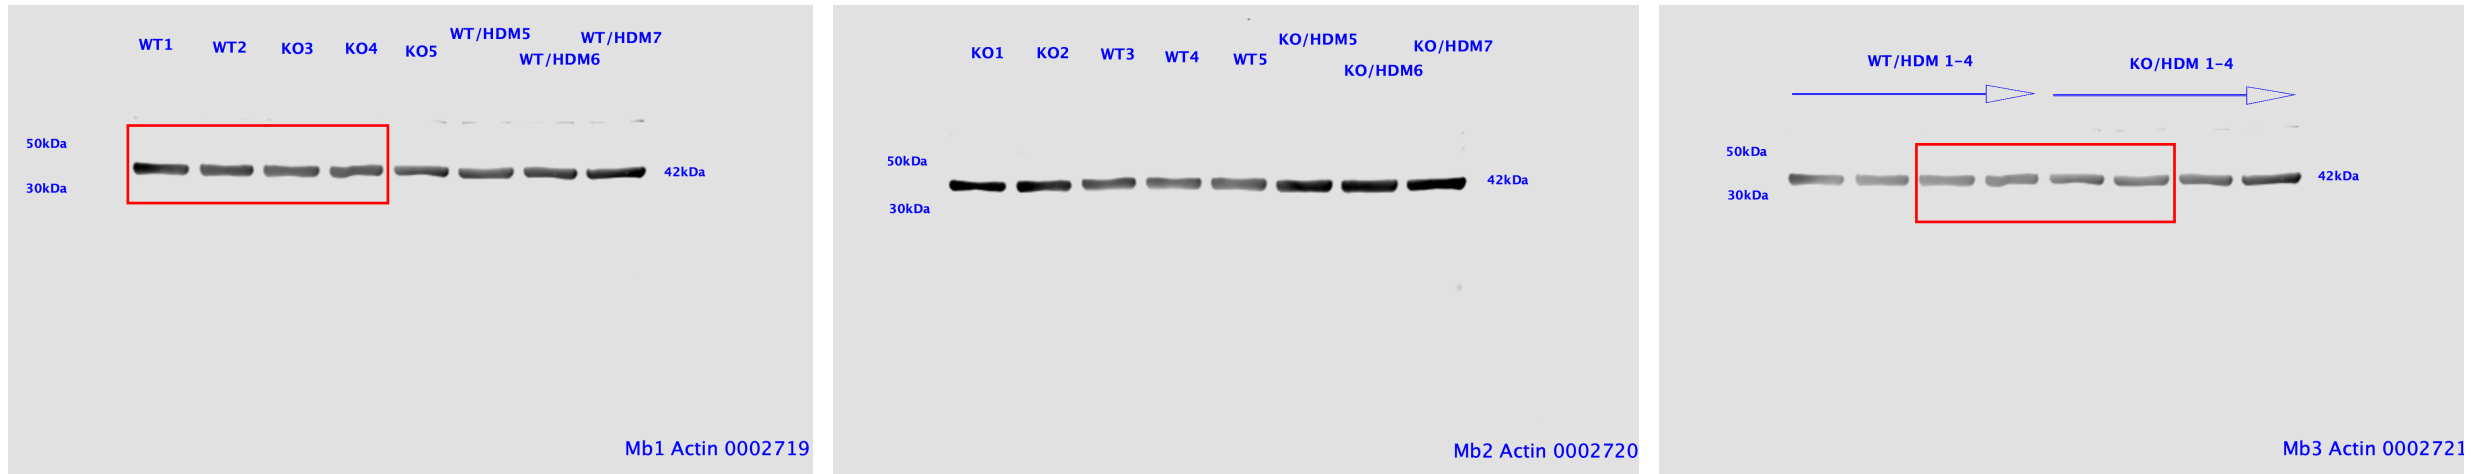

Mb1

Mb2

Mb3

Representative bands

# Full unedited blot in Figure 4D

Antibodies: Cleaved Caspase 3 (19kDa) and  $\beta$ -actin (42kDa)

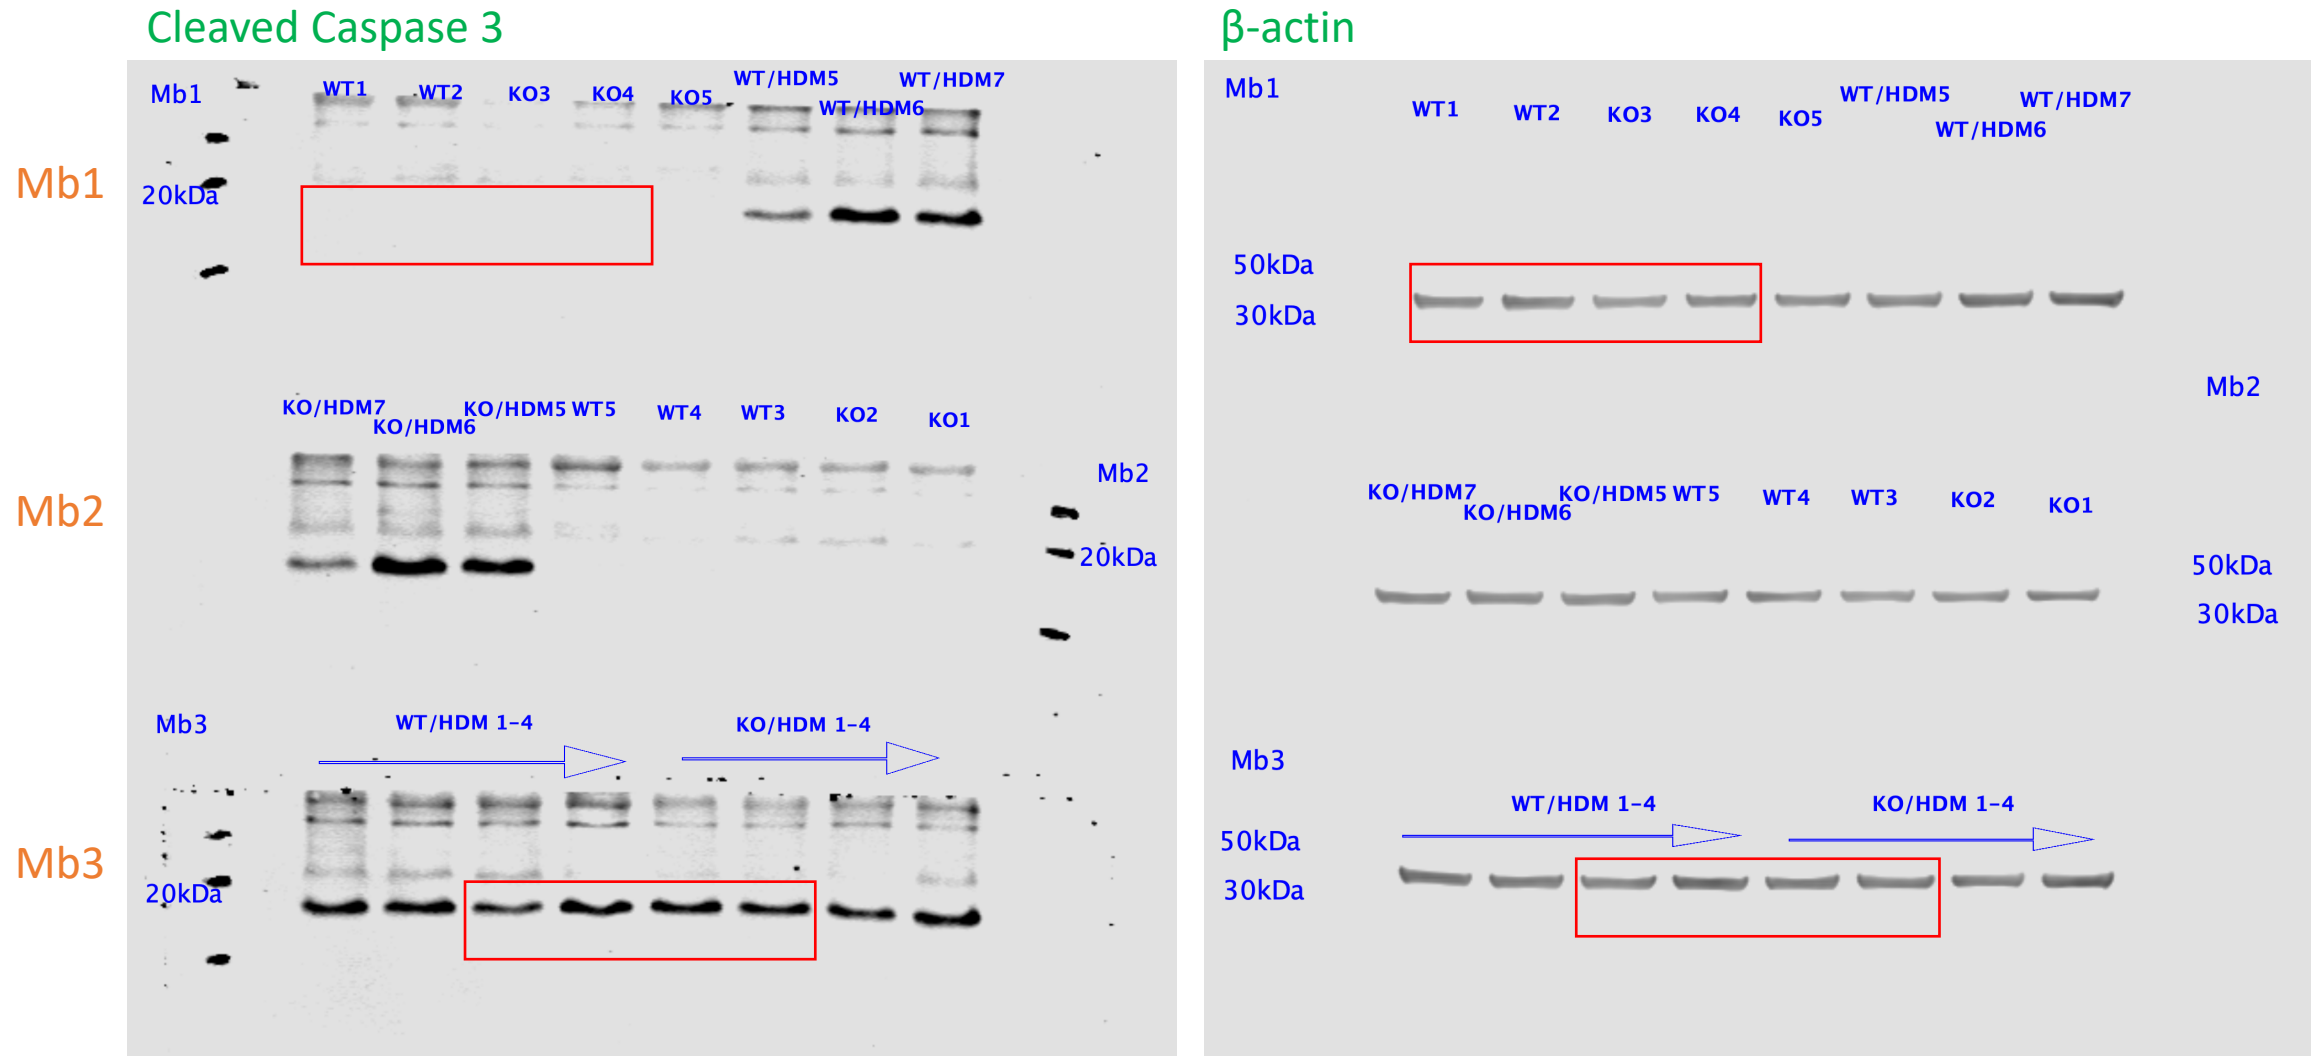

Representative bands

# Full unedited blot in Figure 6A

Antibodies: Adiponectin (28kDa) and  $\beta$ -actin (42kDa)

## Adiponectin

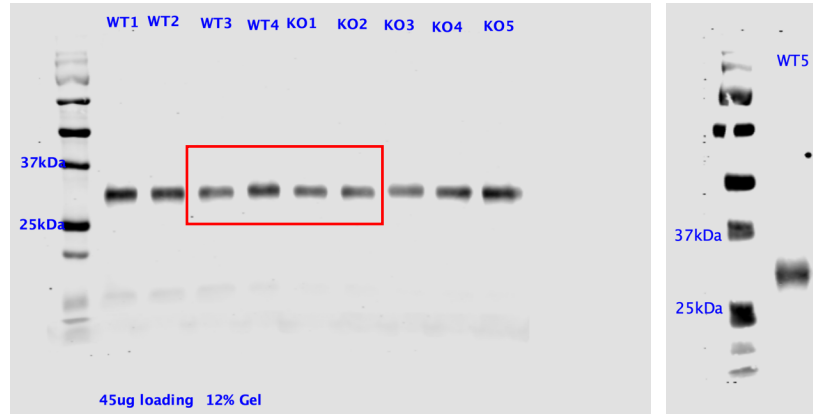

## $\beta$ -actin

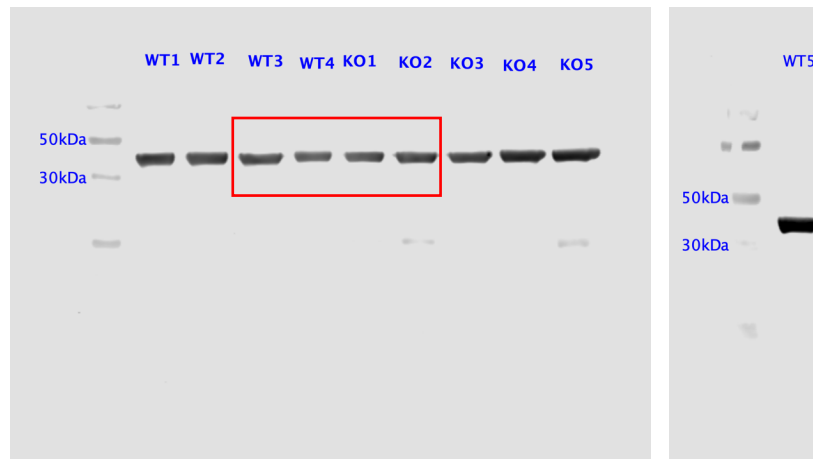

Mb1

Mb2

Representative bands

# Full unedited blot in Figure 6D

Antibodies: Adiponectin (28kDa)

## Adiponectin from conditioned media

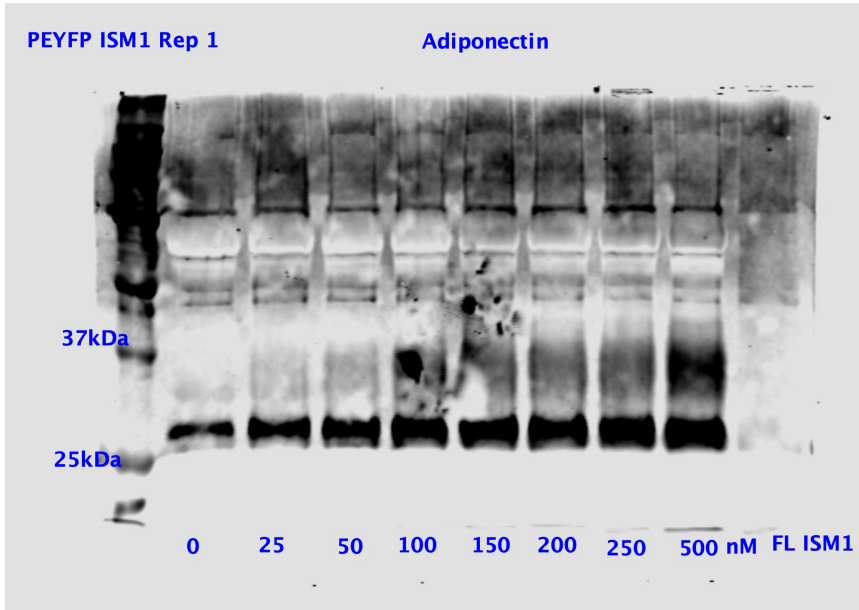

Mb1 (1<sup>st</sup> repeat)

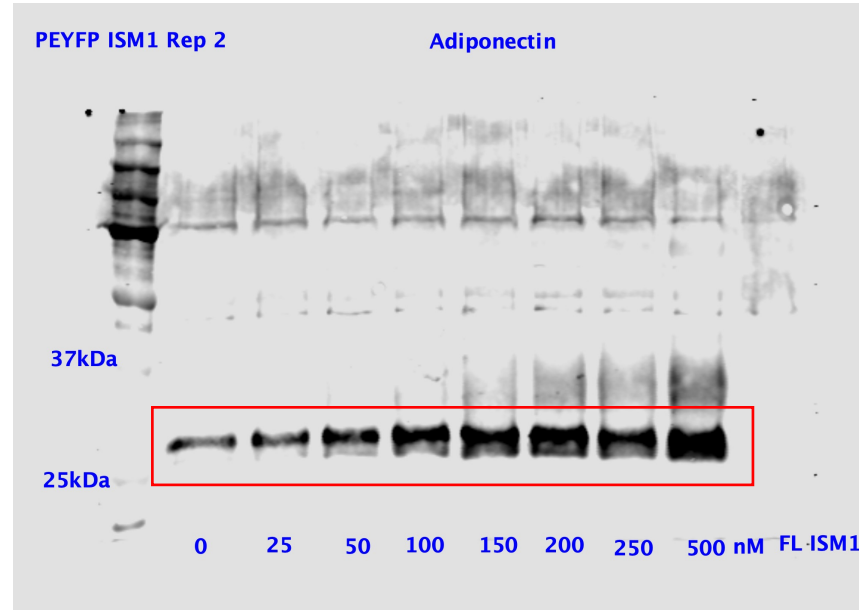

Mb2 (2<sup>nd</sup> repeat)

Representative bands



# Full unedited blot in Figure 6E

Antibodies: PPAR $\gamma$  (66kDa) and  $\beta$ -actin (42kDa)

PPAR $\gamma$

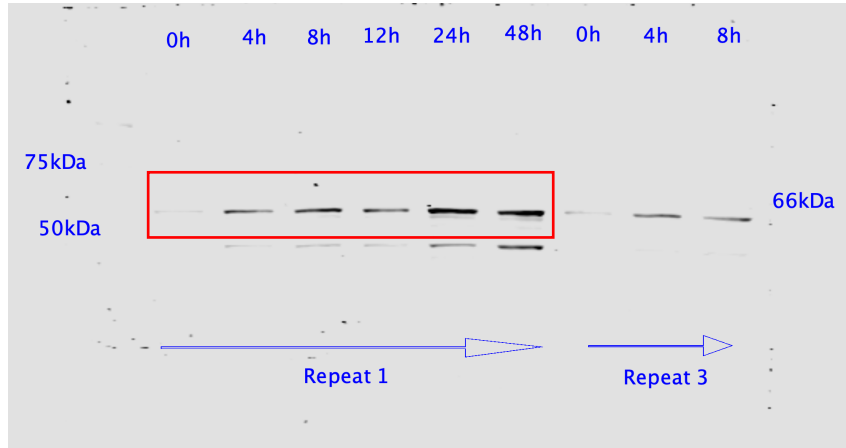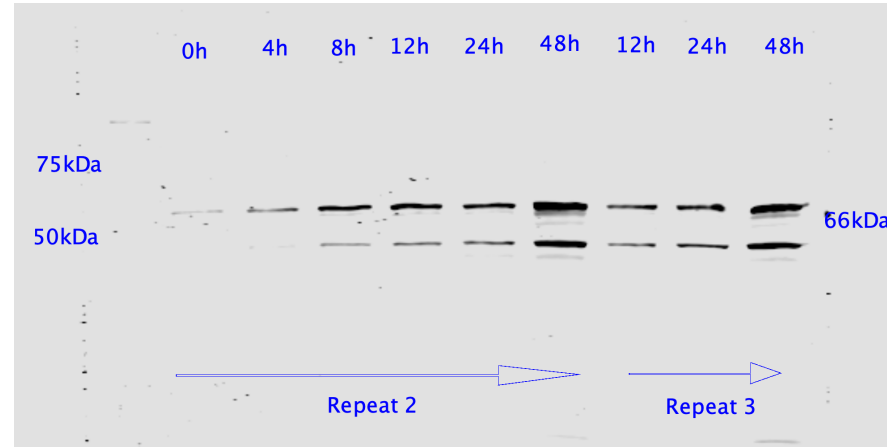

$\beta$ -actin

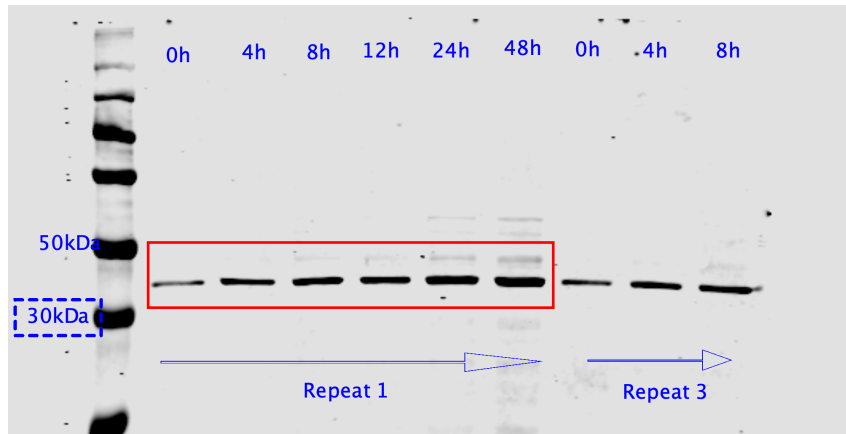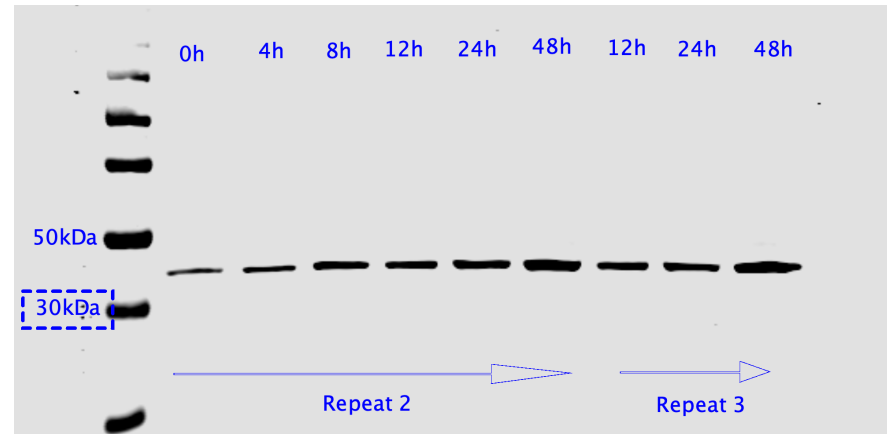

Mb1 (Repeat 1 and 3)

Mb2 (Repeat 2 and 3)

Representative bands

# Full unedited blot in Figure 6G

Antibodies: Adiponectin (Dimers:56kDa and Monomers:28kDa)

## Adiponectin dimers

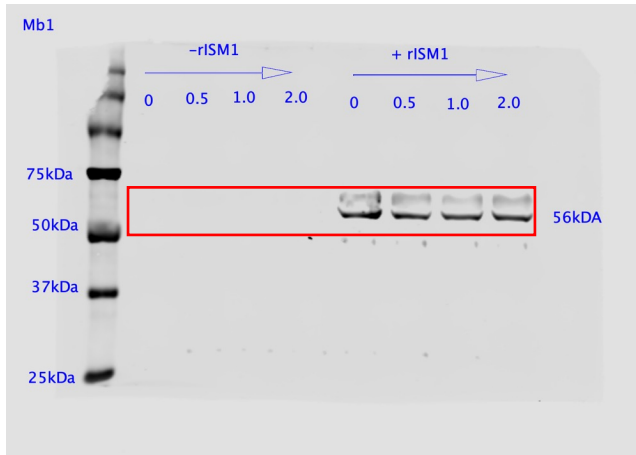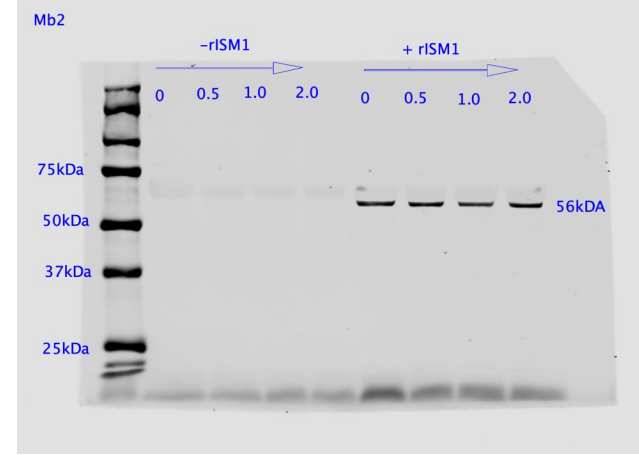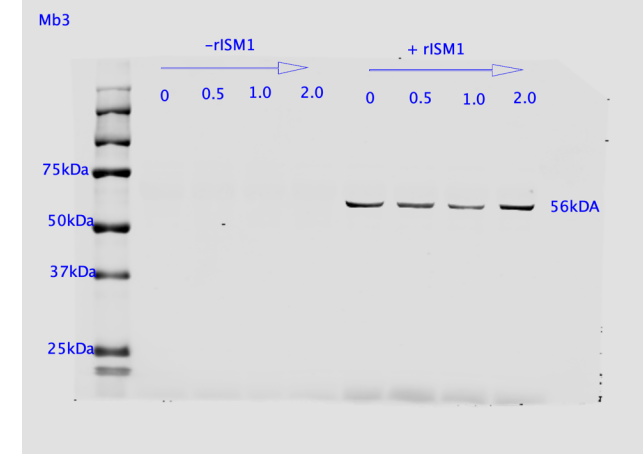

## Adiponectin monomers (Overexposed)

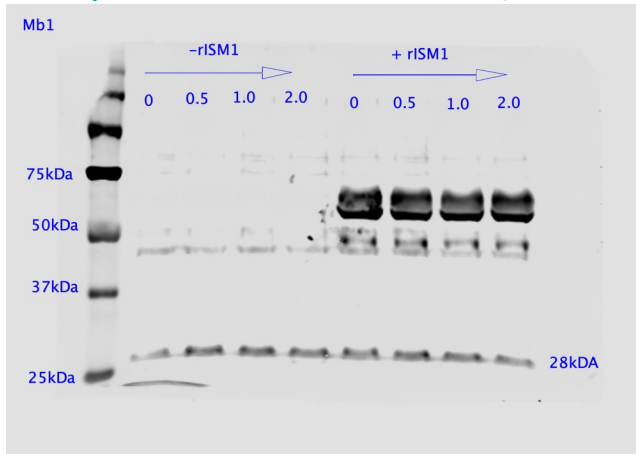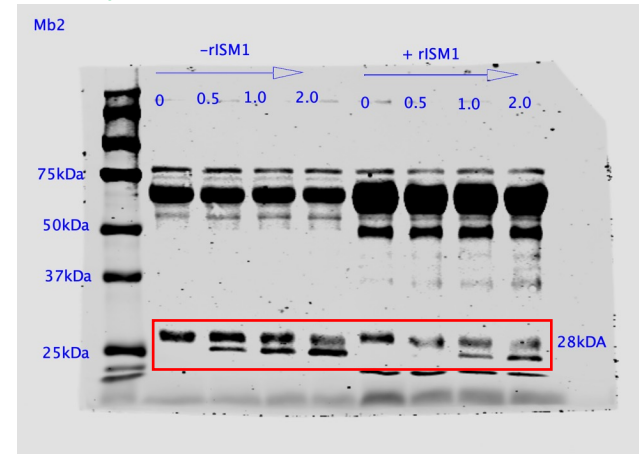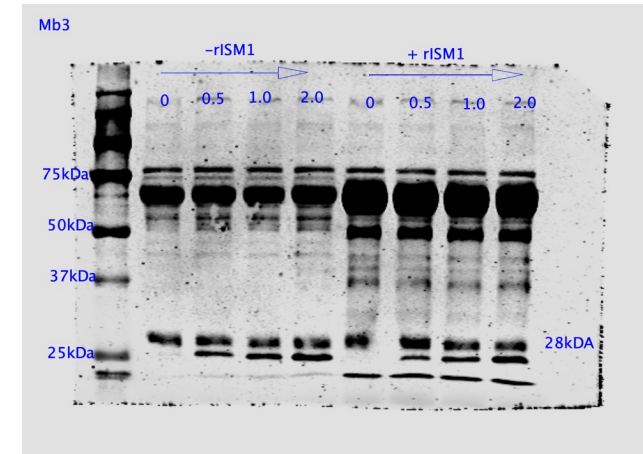

Mb1

Mb2

Mb3

Representative bands

# Full unedited blot in Figure 7F

Antibodies: pMLKL (54kDa) and  $\beta$ -actin (42kDa)

pMLKL

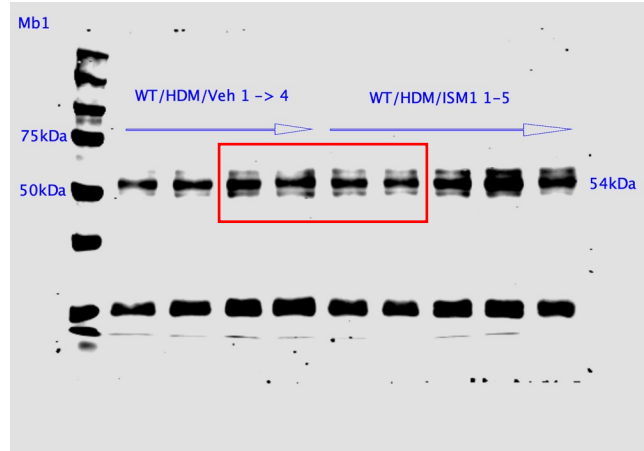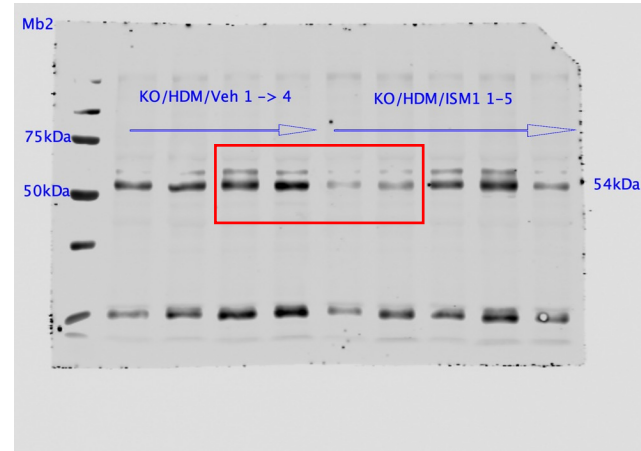

$\beta$ -actin

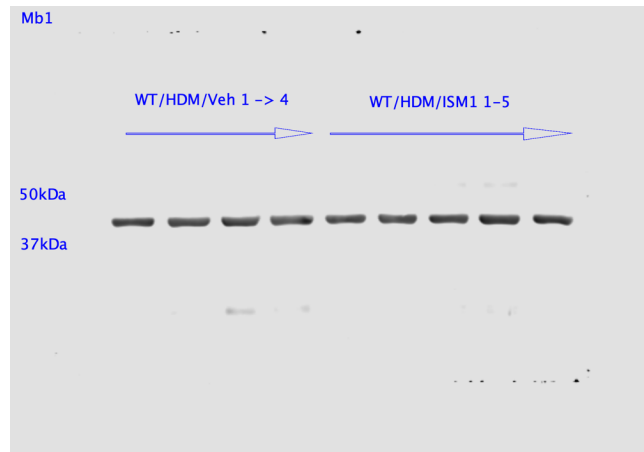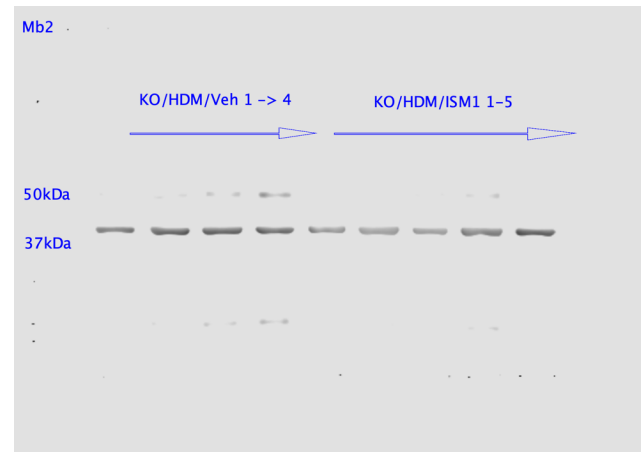

Mb1

Mb2

Representative bands
